# Supplementary material for: Association of Socioeconomic Status With Ideal Cardiovascular Health in Black Men
Source: PubMed Central journal article supplement — J Am Heart Assoc. 2021 Nov 24;10(23):e020184. doi: 10.1161/JAHA.120.020184 (PMC9075410; doi:10.1161/jaha.120.020184), 2021-11-24
Supplement: JAH3-10-e020184-s001.pdf [file JAH3-10-e020184-s001.pdf]

# **Supplemental Material**

**Table S1. Characteristics of Participants in the African American Male Wellness Walk by Location.**

| Baseline Characteristics*          | Ohio<br>n=1,234<br>85% | North<br>Carolina<br>n=139<br>10% | Washington<br>State<br>n=25<br>2% | DMV<br>n=39<br>3% | Other<br>States<br>n=7<br><1% | p-value <sup>a</sup> |
|------------------------------------|------------------------|-----------------------------------|-----------------------------------|-------------------|-------------------------------|----------------------|
| Age (years)                        | 48 (14)                | 48 (15)                           | 51 (11)                           | 42 (11)           | 58 (17)                       | p=0.0190             |
| Insurance Status (%) <sup>†</sup>  |                        |                                   |                                   |                   |                               | p<0.0001             |
| Uninsured                          | 9                      | 13                                | 0                                 | 7.5               | 14                            |                      |
| Medicaid                           | 7.5                    | 1                                 | 0                                 | 13                | 0                             |                      |
| Medicare                           | 14                     | 6                                 | 20                                | 0                 | 29                            |                      |
| Private Insurance                  | 63                     | 41                                | 20                                | 66.5              | 57                            |                      |
| Combination                        | 1.5                    | 7                                 | 4                                 | 0                 | 0                             |                      |
| Did Not Answer                     | 5                      | 32                                | 56                                | 13                | 0                             |                      |
| Education (%) <sup>‡</sup>         |                        |                                   |                                   |                   |                               | p=0.0010             |
| High School or Less                | 24                     | 14                                | 0                                 | 23                | 14                            |                      |
| Some College                       | 20                     | 10                                | 12                                | 10                | 14                            |                      |
| Completed College                  | 32                     | 44                                | 44                                | 36                | 43                            |                      |
| Professional Degree                | 14                     | 23                                | 32                                | 23                | 29                            |                      |
| Other                              | 4                      | 2                                 | 4                                 | 0                 | 0                             |                      |
| Did Not Answer                     | 6                      | 7                                 | 8                                 | 8                 | 0                             |                      |
| Occupation (%) <sup>§</sup>        |                        |                                   |                                   |                   |                               | p<0.0001             |
| Student                            | 2.5                    | 6                                 | 8                                 | 0                 | 14                            |                      |
| Unemployed                         | 5                      | 3                                 | 0                                 | 0                 | 0                             |                      |
| Employed                           | 47.5                   | 70.5                              | 68                                | 44                | 0                             |                      |
| Retired                            | 11                     | 17                                | 20                                | 0                 | 14                            |                      |
| Did Not Answer                     | 34                     | 3.5                               | 4                                 | 56                | 72                            |                      |
| Income (%) <sup>e</sup>            |                        |                                   |                                   |                   |                               | p=0.0356             |
| ≥\$75,000                          | 19                     | 20                                | 20                                | 28                | 0                             |                      |
| \$50,000- \$74,999                 | 20                     | 20                                | 20                                | 26                | 43                            |                      |
| \$20,000- \$49,999                 | 22                     | 12                                | 0                                 | 10                | 14                            |                      |
| <\$20,000                          | 4                      | 3                                 | 0                                 | 3                 | 0                             |                      |
| Did Not Answer                     | 35                     | 45                                | 60                                | 33                | 43                            |                      |
| Systolic Blood Pressure (mmHg)     | 140 (19)               | 141 (21)                          | 144 (18)                          | 139 (18)          | 141 (22)                      | p=0.7040             |
| Diastolic Blood Pressure (mmHg)    | 87 (13)                | 83 (15)                           | 90 (13)                           | 86 (11)           | 81 (9)                        | p=0.0023             |
| Blood Glucose: Fasting (mg/dL)     | 105 (44)               | 107 (34)                          | 90 (16)                           | 91 (27)           | 118 (9)                       | p=0.6856             |
| Blood Glucose: Non-Fasting (mg/dL) | 113 (44)               | 104 (23)                          | 116 (55)                          | 96 (37)           | 123 (36)                      | p=0.1031             |
| Cholesterol                        | 157 (41)               | 175 (41)                          | 144 (35)                          | 156 (48)          | 164 (48)                      | p<0.0001             |

|                                                 |        |        |        |        |    |          |
|-------------------------------------------------|--------|--------|--------|--------|----|----------|
| Body Mass Index (kilograms/meter <sup>2</sup> ) | 31 (6) | 30 (6) | 31 (6) | 28 (5) |    | p=0.2437 |
| Blood Pressure Medication (%)                   | 27     | 22     | 23     | 40     | 57 | p=0.1236 |
| Diabetes Medication (%)                         | 9      | 7      | 20     | 5      | 29 | p=0.0936 |
| Cholesterol Medication (%)                      | 13     | 14     | 16     | 8      | 29 | p=0.5887 |
| Fasting Status (%)                              | 43     | 27     | 28     | 31     | 29 | p=0.0026 |
| Ideal AHA Smoking <sup>f</sup> (%)              | 85     | 87     | 88     | 79     | 86 | p=0.8112 |
| Ideal AHA Physical Activity <sup>f</sup> (%)    | 59     | 71     | 68     | 72     | 43 | p=0.0232 |
| Ideal AHA Blood Pressure <sup>f</sup> (%)       | 7      | 10     | 0      | 10     | 14 | p=0.4764 |
| Ideal AHA Glucose <sup>f</sup> (%)              | 67     | 73     | 60     | 82     | 57 | p=0.1385 |
| Ideal AHA Body mass index <sup>f</sup> (%)      | 16     | 16     | 16     | 18     | 14 | p=0.5245 |
| Ideal AHA Cholesterol <sup>f</sup> (%)          | 74     | 60     | 80     | 85     | 57 | p=0.0029 |
| Ideal Cardiovascular Health <sup>g</sup>        |        |        |        |        |    | p=0.1731 |
| 0-2 Metrics                                     | 29     | 26     | 36     | 15     | 57 |          |
| 3-4 Metrics                                     | 64     | 63     | 60     | 80     | 29 |          |
| 5-6 Metrics                                     | 7      | 11     | 4      | 5      | 14 |          |

DMV=Washington D.C., Maryland, Virginia; AHA=American Heart Association

\* Mean (SD) or percentages are listed, p-values calculated using chi-square or Fisher's exact (categorical variables), and ANOVA (parametric continuous variables)

<sup>†</sup> Health Insurance: No Insurance n=134, Medicaid n=100, Medicare n=186, Private Insurance n=869, Combination n=30, Did Not Answer n=125

<sup>‡</sup> Education: High School or Less n=324, Some College n=272, Completed College n=482, Professional Degree n=220, Other n=57, Did Not Answer n=89

<sup>§</sup> Occupation: Employed n=719, Unemployed n=63, Student n=44, Retired n=168, Missing/Did Not Answer n=450

<sup>e</sup> Income: ≥\$75,000 n=274, \$50,000 – 74,999 n=294, \$20,000 – 49,999 n=292, <\$20,000 n=52, Did Not Answer n=532

<sup>f</sup> Ideal Cardiovascular (CV) Health recommendations were defined by AHA "2020" guidelines with the following modifications. Physical activity was considered ideal if participant exercised ≥ 3 times per week. Glucose was defined using standard fasting glucose guidelines and random glucose guidelines < 140 ideal, 140-180 intermediate and ≥ 180 "poor"

<sup>g</sup> Ideal Cardiovascular Health: 0-2 n=411, 3-4 n=926, 5-6 n=107

DMV – Washington DC, Maryland, and Virginia

**Table S2. Characteristics of Participants in the African American Male Wellness Walk by Health Insurance Status.**

| Baseline Characteristics*                       | Health Insurance Status |                   |                   |                  |                     |                         | p-value  |
|-------------------------------------------------|-------------------------|-------------------|-------------------|------------------|---------------------|-------------------------|----------|
|                                                 | Uninsured<br>n=134      | Medicaid<br>n=100 | Medicare<br>n=186 | Private<br>n=869 | Combination<br>n=30 | Did Not Answer<br>n=125 |          |
| Age (years)                                     | 43 (13)                 | 46 (15)           | 57 (17)           | 47 (12)          | 68 (10)             | 47 (13)                 | p<0.0001 |
| Systolic Blood Pressure (mmHg)                  | 137 (18)                | 133 (19)          | 142 (21)          | 140 (18)         | 142 (21)            | 142 (20)                | p=0.0002 |
| Diastolic Blood Pressure (mmHg)                 | 86 (13)                 | 83 (13)           | 86 (13)           | 88 (13)          | 87 (16)             | 87 (14)                 | p=0.0576 |
| Blood Glucose: Fasting (mg/dL)                  | 109 (42)                | 104 (31)          | 105 (33)          | 102 (32)         | 156 (168)           | 112 (73)                | p=0.0054 |
| Blood Glucose: Non-Fasting (mg/dL)              | 110 (46)                | 113 (45)          | 113 (40)          | 111 (43)         | 117 (43)            | 107 (32)                | p=0.9261 |
| Cholesterol                                     | 163 (40)                | 160 (40)          | 156 (44)          | 159 (41)         | 156 (43)            | 159 (42)                | p=0.8022 |
| Body Mass Index (kilograms/meter <sup>2</sup> ) | 30 (8)                  | 28 (5)            | 29 (6)            | 31 (6)           | 30 (6)              | 30 (6)                  | p=0.0001 |
| Blood Pressure Medication (%)                   | 13                      | 23                | 41                | 25               | 67                  | 26                      | p<0.0001 |
| Diabetes Medication (%)                         | 5                       | 7                 | 17                | 9                | 17                  | 6                       | p=0.0008 |
| Cholesterol Medication (%)                      | 7                       | 12                | 24                | 11               | 43                  | 10                      | p<0.0001 |
| Fasting Status (%)                              | 37                      | 40                | 37                | 43               | 30                  | 36                      | p=0.2274 |
| Ideal AHA Smoking (%) <sup>†</sup>              | 66                      | 80                | 77                | 90               | 90                  | 87                      | p<0.0001 |
| Ideal AHA Physical Activity (%) <sup>†</sup>    | 61                      | 56                | 59                | 61               | 60                  | 62                      | p=0.9518 |
| Ideal AHA Blood Pressure (%) <sup>†</sup>       | 10                      | 17                | 8                 | 7                | 0.0                 | 7                       | p=0.0062 |
| Ideal AHA Glucose (%) <sup>†</sup>              | 71                      | 66                | 64                | 68               | 60                  | 66                      | p=0.9676 |
| Ideal AHA Body mass index (%) <sup>†</sup>      | 22                      | 27                | 20                | 13               | 13                  | 19                      | p=0.0008 |
| Ideal AHA Cholesterol (%) <sup>†</sup>          | 78                      | 73                | 63                | 75               | 43                  | 75                      | p<0.0001 |
| Ideal Cardiovascular Health <sup>‡</sup>        |                         |                   |                   |                  |                     |                         | p<0.0001 |
| 0-2 Metrics                                     | 31                      | 29                | 39                | 25               | 50                  | 28                      |          |
| 3-4 Metrics                                     | 58                      | 58                | 52.5              | 69               | 50                  | 64                      |          |
| 5-6 Metrics                                     | 11                      | 13                | 8.5               | 6                | 0                   | 8                       |          |

AHA = American Heart Association

\* Mean (SD) or percentages are listed, p-values calculated using chi-square or Fisher's exact (categorical variables), and ANOVA (parametric continuous variables)

<sup>†</sup> AHA Ideal Cardiovascular Health recommendations were defined by AHA "2020" guidelines with the following modifications. Physical activity was considered ideal if participant exercised  $\geq 3$  times per week. Glucose was defined using standard fasting glucose guidelines and random glucose guidelines < 140 ideal, 140-180 intermediate and  $\geq 180$  "poor"

<sup>‡</sup> Ideal Cardiovascular Health: 0-2 n=411, 3-4 n=926, 5-6 n=107

**Table S3. Characteristics of Participants in the African American Male Wellness Walk by Educational Attainment.**

| Baseline Characteristics*                       | Educational Status           |                       |                            |                              |                                  |                        | p-value  |
|-------------------------------------------------|------------------------------|-----------------------|----------------------------|------------------------------|----------------------------------|------------------------|----------|
|                                                 | High School or Less<br>n=324 | Some College<br>n=272 | Completed College<br>n=482 | Professional Degree<br>n=220 | Other Educational Degree<br>n=57 | Did Not Answer<br>n=89 |          |
| Age (years)                                     | 48 (16)                      | 49 (14)               | 47 (14)                    | 48 (13)                      | 51 (14)                          | 50 (13)                | p=0.1395 |
| Systolic Blood Pressure (mmHg)                  | 139 (20)                     | 140 (19)              | 140 (20)                   | 141 (18)                     | 142 (16)                         | 139 (18)               | p=0.8894 |
| Diastolic Blood Pressure (mmHg)                 | 86 (13)                      | 88 (13)               | 86 (14)                    | 88 (13)                      | 88 (11)                          | 87 (14)                | p=0.3456 |
| Blood Glucose: Fasting (mg/dL)                  | 110 (67)                     | 101 (25)              | 106 (37)                   | 98 (23)                      | 109 (42)                         | 103 (36)               | p=0.3234 |
| Blood Glucose: Non-Fasting (mg/dL)              | 113 (39)                     | 117 (57)              | 107 (35)                   | 109 (34)                     | 115 (57)                         | 114 (37)               | p=0.1945 |
| Cholesterol                                     | 156 (41)                     | 160 (44)              | 159 (39)                   | 165 (41)                     | 150 (50)                         | 155 (38)               | p=0.0527 |
| Body Mass Index (kilograms/meter <sup>2</sup> ) | 30 (7)                       | 30 (6)                | 31 (6)                     | 31 (6)                       | 31 (7)                           | 29 (6)                 | p=0.2117 |
| Blood Pressure Medication (%)                   | 24                           | 28                    | 30                         | 28                           | 30                               | 16                     | p=0.0802 |
| Diabetes Medication (%)                         | 10                           | 10                    | 10                         | 7                            | 14                               | 6                      | p=0.4673 |
| Cholesterol Medication (%)                      | 12                           | 17                    | 12                         | 13                           | 21                               | 10                     | p=0.1107 |
| Fasting Status (%)                              | 42                           | 40                    | 38                         | 44                           | 44                               | 46                     | p=0.5768 |
| Ideal AHA Smoking (%) <sup>†</sup>              | 78                           | 84                    | 87                         | 94                           | 81                               | 84                     | p<0.0001 |
| Ideal AHA Physical Activity (%) <sup>†</sup>    | 58                           | 53                    | 66                         | 61                           | 54                               | 57                     | p=0.0100 |
| Ideal AHA Blood Pressure (%) <sup>†</sup>       | 9                            | 7                     | 9                          | 5                            | 2                                | 9                      | p=0.3242 |
| Ideal AHA Glucose (%) <sup>†</sup>              | 67                           | 65                    | 69                         | 70                           | 58                               | 65                     | p=0.4984 |
| Ideal AHA Body mass index (%) <sup>†</sup>      | 23                           | 16                    | 13                         | 13                           | 11                               | 18                     | p=0.0070 |
| Ideal AHA Cholesterol (%) <sup>†</sup>          | 76                           | 68                    | 76                         | 69                           | 70                               | 78                     | p=0.3730 |
| Ideal Cardiovascular Health <sup>‡</sup>        |                              |                       |                            |                              |                                  |                        | p=0.3411 |
| 0-2 Metrics                                     | 30                           | 33                    | 24.5                       | 27                           | 37                               | 29                     |          |
| 3-4 Metrics                                     | 63                           | 60                    | 67.5                       | 65                           | 61                               | 63                     |          |
| 5-6 Metrics                                     | 7                            | 7                     | 8                          | 8                            | 2                                | 8                      |          |

AHA = American Heart Association

\* Mean (SD) or percentages are listed, p-values calculated using chi-square or Fisher's exact (categorical variables), and ANOVA (parametric continuous variables)

<sup>†</sup>AHA Ideal Cardiovascular Health recommendations were defined by AHA "2020" guidelines with the following modifications. Physical activity was considered ideal if participant exercised ≥ 3 times per week. Glucose was defined using standard fasting glucose guidelines and random glucose guidelines < 140 ideal, 140-180 intermediate and ≥ 180 "poor"

<sup>‡</sup> Ideal Cardiovascular Health: 0-2 n=411, 3-4 n=926, 5-6 n=107

**Table S4. Characteristics of Participants in the African American Male Wellness Walk by Employment Status.**

| Baseline Characteristics*                       | Employment Status |                    |                 |                  |                         | p-value  |
|-------------------------------------------------|-------------------|--------------------|-----------------|------------------|-------------------------|----------|
|                                                 | Employed<br>n=719 | Unemployed<br>n=63 | Student<br>n=44 | Retired<br>n=168 | Did Not Answer<br>n=450 |          |
| Age (years)                                     | 45 (12)           | 48 (14)            | 37 (16)         | 66 (8)           | 48 (13)                 | p<0.0001 |
| Systolic Blood Pressure (mmHg)                  | 140 (18)          | 136 (22)           | 131 (18)        | 142 (20)         | 141 (20)                | p=0.0021 |
| Diastolic Blood Pressure (mmHg)                 | 87 (13)           | 87 (17)            | 80 (14)         | 86 (13)          | 87 (13)                 | p=0.0102 |
| Blood Glucose: Fasting (mg/dL)                  | 102 (30)          | 102 (33)           | 100 (25)        | 111 (68)         | 108 (50)                | p=0.3733 |
| Blood Glucose: Non-Fasting (mg/dL)              | 109 (40)          | 110 (49)           | 107 (30)        | 121 (47)         | 112 (43)                | p=0.1546 |
| Cholesterol                                     | 157 (40)          | 155 (38)           | 156 (54)        | 155 (44)         | 164 (41)                | p=0.0379 |
| Body Mass Index (kilograms/meter <sup>2</sup> ) | 31 (6)            | 31 (9)             | 29 (7)          | 30 (5)           | 30 (6)                  | p=0.0338 |
| Blood Pressure Medication (%)                   | 22                | 21                 | 18              | 47               | 29                      | p<0.0001 |
| Diabetes Medication (%)                         | 8                 | 10                 | 5               | 15               | 10                      | p=0.0202 |
| Cholesterol Medication (%)                      | 9                 | 14                 | 9               | 35               | 13                      | p<0.0001 |
| Fasting Status (%)                              | 41                | 46                 | 32              | 40               | 41                      | p=0.7008 |
| Ideal AHA Smoking (%) <sup>†</sup>              | 85                | 76                 | 77              | 91               | 85                      | p=0.0295 |
| Ideal AHA Physical Activity (%) <sup>†</sup>    | 61                | 44                 | 59              | 55               | 64                      | p=0.0353 |
| Ideal AHA Blood Pressure (%) <sup>†</sup>       | 7                 | 16                 | 20              | 4                | 8                       | p=0.0010 |
| Ideal AHA Glucose (%) <sup>†</sup>              | 69                | 63                 | 80              | 57               | 68                      | p=0.0843 |
| Ideal AHA Body mass index (%) <sup>†</sup>      | 15                | 25                 | 27              | 14               | 17                      | p=0.0602 |
| Ideal AHA Cholesterol (%) <sup>†</sup>          | 79                | 76                 | 77              | 53               | 71                      | p<0.0001 |
| Ideal Cardiovascular Health <sup>‡</sup>        |                   |                    |                 |                  |                         | p<0.0001 |
| 0-2 Metrics                                     | 26                | 33                 | 30              | 42               | 26                      |          |
| 3-4 Metrics                                     | 66                | 57                 | 45              | 53               | 68                      |          |
| 5-6 Metrics                                     | 8                 | 10                 | 25              | 5                | 6                       |          |

AHA = American Heart Association

\* Mean (SD) or percentages are listed, p-values calculated using chi-square or Fisher's exact (categorical variables), and ANOVA (parametric continuous variables)

<sup>†</sup> AHA Ideal Cardiovascular Health recommendations were defined by AHA "2020" guidelines with the following modifications. Physical activity was considered ideal if participant exercised  $\geq 3$  times per week. Glucose was defined using standard fasting glucose guidelines and random glucose guidelines < 140 ideal, 140-180 intermediate and  $\geq 180$  "poor"

<sup>‡</sup> Ideal Cardiovascular Health: 0-2 n=411, 3-4 n=926, 5-6 n=107

**Table S5. Characteristics of Participants in the African American Male Wellness Walk by Annual Income Status.**

| Baseline Characteristics*                       | Income Status      |                                |                                |                   |                            | p-value  |
|-------------------------------------------------|--------------------|--------------------------------|--------------------------------|-------------------|----------------------------|----------|
|                                                 | ≥\$75,000<br>n=274 | \$50,000-<br>\$74,999<br>n=294 | \$20,000-<br>\$49,999<br>n=292 | <\$20,000<br>n=52 | Did Not<br>Answer<br>n=532 |          |
| Age (years)                                     | 49 (11)            | 48 (13)                        | 46 (15)                        | 47 (20)           | 49 (15)                    | p=0.1055 |
| Systolic Blood Pressure (mmHg)                  | 140 (18)           | 142 (18)                       | 139 (20)                       | 135 (19)          | 139 (20)                   | p=0.0688 |
| Diastolic Blood Pressure (mmHg)                 | 88 (13)            | 88 (13)                        | 87 (12)                        | 85 (15)           | 86 (14)                    | p=0.0144 |
| Blood Glucose: Fasting (mg/dL)                  | 98 (22)            | 105 (37)                       | 107 (41)                       | 124 (117)         | 105 (43)                   | p=0.1092 |
| Blood Glucose: Non-Fasting (mg/dL)              | 107 (35)           | 112 (41)                       | 117 (47)                       | 117 (40)          | 109 (42)                   | p=0.2005 |
| Cholesterol                                     | 163 (41)           | 161 (45)                       | 160 (40)                       | 149 (42)          | 156 (39)                   | p=0.0527 |
| Body Mass Index (kilograms/meter <sup>2</sup> ) | 31 (6)             | 31 (6)                         | 30 (7)                         | 28 (7)            | 30 (6)                     | p=0.0202 |
| Blood Pressure Medication (%)                   | 27                 | 27                             | 27                             | 25                | 27                         | p=0.9971 |
| Diabetes Medication (%)                         | 7                  | 10                             | 11                             | 19                | 9                          | p=0.0484 |
| Cholesterol Medication (%)                      | 12                 | 12                             | 12                             | 19                | 14                         | p=0.6274 |
| Fasting Status (%)                              | 47                 | 41                             | 40                             | 38                | 38                         | p=0.1899 |
| Ideal AHA Smoking (%) <sup>†</sup>              | 92                 | 88                             | 83                             | 63                | 83                         | p<0.0001 |
| Ideal AHA Physical Activity (%) <sup>†</sup>    | 63                 | 60                             | 59                             | 48                | 61                         | p=0.3943 |
| Ideal AHA Blood Pressure (%) <sup>†</sup>       | 5                  | 4                              | 11                             | 10                | 9                          | p=0.0161 |
| Ideal AHA Glucose (%) <sup>†</sup>              | 71                 | 68                             | 63                             | 63                | 68                         | p=0.4125 |
| Ideal AHA Body mass index (%) <sup>†</sup>      | 11                 | 11                             | 20                             | 38                | 17                         | p<0.0001 |
| Ideal AHA Cholesterol (%) <sup>†</sup>          | 71                 | 75                             | 76                             | 71                | 72                         | p=0.4573 |
| Ideal Cardiovascular Health <sup>‡</sup>        |                    |                                |                                |                   |                            | p=0.0005 |
| 0-2 Metrics                                     | 27                 | 26                             | 28                             | 40                | 29                         |          |
| 3-4 Metrics                                     | 67                 | 71                             | 61                             | 44                | 63                         |          |
| 5-6 Metrics                                     | 6                  | 3                              | 11                             | 16                | 8                          |          |

AHA = American Heart Association

\* Mean (SD) or percentages are listed, p-values calculated using chi-square or Fisher's exact (categorical variables), and ANOVA (parametric continuous variables)

<sup>†</sup> AHA Ideal Cardiovascular Health recommendations were defined by AHA "2020" guidelines with the following modifications. Physical activity was considered ideal if participant exercised ≥ 3 times per week. Glucose was defined using standard fasting glucose guidelines and random glucose guidelines < 140 ideal, 140-180 intermediate and ≥ 180 "poor"

<sup>‡</sup> Ideal Cardiovascular Health: 0-2 n=411, 3-4 n=926, 5-6 n=107

**Table S6. Characteristics of Participants in the African American Male Wellness Walk by Missingness of Socioeconomic Status Characteristics.**

| Baseline Characteristics*                       | Number of Missing Socioeconomic Status Characteristics |            |            |           |           | p-value <sup>a</sup> |
|-------------------------------------------------|--------------------------------------------------------|------------|------------|-----------|-----------|----------------------|
|                                                 | 0<br>n=588                                             | 1<br>n=544 | 2<br>n=266 | 3<br>n=34 | 4<br>n=2  |                      |
| Age (years)                                     | 48 (14)                                                | 48 (14)    | 48 (14)    | 57 (11)   | 52(16)    | p=0.9695             |
| Systolic Blood Pressure (mmHg)                  | 140 (19)                                               | 140 (20)   | 141 (18)   | 142 (26)  | 137 (4)   | p=0.8749             |
| Diastolic Blood Pressure (mmHg)                 | 88 (13)                                                | 85 (13)    | 88 (13)    | 88 (18)   | 78 (4)    | p=0.0132             |
| Blood Glucose: Fasting (mg/dL)                  | 104 (42)                                               | 103 (39)   | 104 (30)   | 135 (120) | 111 (n/a) | p=0.1197             |
| Blood Glucose: Non-Fasting (mg/dL)              | 115 (43)                                               | 107 (40)   | 111 (42)   | 115 (36)  | 166 (n/a) | p=0.1464             |
| Cholesterol                                     | 159 (43)                                               | 159 (41)   | 157 (38)   | 166 (46)  | 202 (37)  | p=0.4314             |
| Body Mass Index (kilograms/meter <sup>2</sup> ) | 31 (6)                                                 | 30 (6)     | 30 (6)     | 28 (5)    | 30 (6)    | p=0.0526             |
| Blood Pressure Medication (%)                   | 27                                                     | 27         | 25         | 35        | 0         | p=0.6545             |
| Diabetes Medication (%)                         | 10                                                     | 10         | 9          | 6         | 0         | p=0.8993             |
| Cholesterol Medication (%)                      | 13                                                     | 15         | 12         | 6         | 0         | p=0.4152             |
| Fasting Status (%)                              | 43                                                     | 40         | 39         | 49        | 50        | p=0.7759             |
| Ideal AHA Smoking (%) <sup>†</sup>              | 86                                                     | 85         | 83         | 79        | 100       | p=0.7486             |
| Ideal AHA Physical Activity (%) <sup>†</sup>    | 58                                                     | 61         | 63         | 56        | 50        | p=0.6025             |
| Ideal AHA Blood Pressure (%) <sup>†</sup>       | 7                                                      | 8          | 8          | 15        | 0         | p=0.1227             |
| Ideal AHA Glucose (%) <sup>†</sup>              | 65                                                     | 71         | 67         | 62        | 0         | p=0.1576             |
| Ideal AHA Body mass index (%) <sup>†</sup>      | 14                                                     | 18         | 16         | 21        | 0         | p=0.2030             |
| Ideal AHA Cholesterol (%) <sup>†</sup>          | 75                                                     | 70         | 75         | 71        | 50        | p=0.0918             |
| Ideal Cardiovascular Health <sup>‡</sup>        |                                                        |            |            |           |           | p=0.4718             |
| 0-2 Metrics                                     | 30                                                     | 26         | 29         | 26        | 100       |                      |
| 3-4 Metrics                                     | 63                                                     | 66         | 64         | 68        | 0         |                      |
| 5-6 Metrics                                     | 7                                                      | 8          | 7          | 6         | 0         |                      |
| Location <sup>§</sup>                           |                                                        |            |            |           |           | p=0.0278             |
| Ohio                                            | 89                                                     | 82         | 83         | 82        | 100       |                      |
| North Carolina                                  | 8                                                      | 12         | 9          | 3         | 0         |                      |
| Washington State                                | 1                                                      | 2          | 3          | 6         | 0         |                      |
| DMV                                             | 2                                                      | 3          | 4          | 9         | 0         |                      |
| Other States                                    | 0                                                      | 1          | 1          | 0         | 0         |                      |

AHA = American Heart Association; DMV = Washington DC, Maryland, and Virginia

\* Mean (SD) or percentages are listed, p-values calculated using chi-square or Fisher's exact (categorical variables), and ANOVA (parametric continuous variables)



<sup>†</sup> AHA Ideal Cardiovascular Health recommendations were defined by AHA “2020” guidelines with the following modifications. Physical activity was considered ideal if participant exercised  $\geq 3$  times per week. Glucose was defined using standard fasting glucose guidelines and random glucose guidelines  $< 140$  ideal, 140-180 intermediate and  $\geq 180$  “poor”

<sup>‡</sup> Ideal Cardiovascular Health: 0-2 n=411, 3-4 n=926, 5-6 n=107

<sup>§</sup> Location: Ohio n=1234, North Carolina n=139, Washington State n=25, Other State n=7, Washington DC, Maryland, and Virginia, n=39.

**Table S7. Characteristics of Participants in the African American Male Wellness Walk by Ideal Cardiovascular Health Score 2017-2019 in the Complete Case Cohort (n=588).**

| Baseline Characteristics*                       | All<br>n=588 | 0-2 Ideal CV<br>Health Score<br>n=177 | 3-4 Ideal CV<br>Health Score<br>n=369 | 5-6 Ideal CV<br>Health Score<br>n=42 | p-value <sup>a</sup> |
|-------------------------------------------------|--------------|---------------------------------------|---------------------------------------|--------------------------------------|----------------------|
| Age (years)                                     | 48 (14)      | 51 (13)                               | 48 (13)                               | 39 (17)                              | p<0.0001             |
| Insurance Status (%) <sup>†</sup>               |              |                                       |                                       |                                      | p=0.0123             |
| Uninsured                                       | 9            | 11                                    | 7                                     | 14                                   |                      |
| Medicaid                                        | 7            | 8                                     | 7                                     | 7                                    |                      |
| Medicare                                        | 12           | 16                                    | 9                                     | 22                                   |                      |
| Private Insurance                               | 69           | 61                                    | 75                                    | 57                                   |                      |
| Combination                                     | 3            | 4                                     | 2                                     | 0                                    |                      |
| Education (%) <sup>‡</sup>                      |              |                                       |                                       |                                      | p=0.2171             |
| High School or Less                             | 20           | 25                                    | 18                                    | 14                                   |                      |
| Some College                                    | 19           | 20                                    | 18                                    | 21                                   |                      |
| Completed College                               | 35           | 29                                    | 38                                    | 41                                   |                      |
| Professional Degree                             | 19           | 17                                    | 20                                    | 21                                   |                      |
| Other                                           | 7            | 9                                     | 6                                     | 3                                    |                      |
| Occupation (%) <sup>§</sup>                     |              |                                       |                                       |                                      | p=0.0017             |
| Student                                         | 3            | 3                                     | 2                                     | 9                                    |                      |
| Unemployed                                      | 5            | 7                                     | 3                                     | 5                                    |                      |
| Employed                                        | 78           | 70                                    | 83                                    | 74                                   |                      |
| Retired                                         | 14           | 20                                    | 12                                    | 12                                   |                      |
| Income (%) <sup>  </sup>                        |              |                                       |                                       |                                      | p=0.0003             |
| ≥\$75,000                                       | 29           | 28                                    | 30                                    | 26                                   |                      |
| \$50,000- \$74,999                              | 32           | 29                                    | 36                                    | 10                                   |                      |
| \$20,000- \$49,999                              | 32           | 32                                    | 30                                    | 50                                   |                      |
| <\$20,000                                       | 7            | 11                                    | 4                                     | 14                                   |                      |
| Systolic Blood Pressure (mmHg)                  | 140 (19)     | 144 (19)                              | 140 (18)                              | 122 (15)                             | p<0.0001             |
| Diastolic Blood Pressure (mmHg)                 | 88 (13)      | 91 (12)                               | 88 (13)                               | 76 (9)                               | p<0.0001             |
| Blood Glucose: Fasting (mg/dL)                  | 104 (42)     | 122 (56)                              | 95 (26)                               | 79 (15)                              | p<0.0001             |
| Blood Glucose: Non-Fasting (mg/dL)              | 115 (43)     | 148 (58)                              | 105 (31)                              | 96 (23)                              | p<0.0001             |
| Cholesterol                                     | 159 (43)     | 169 (52)                              | 155 (38)                              | 143 (29)                             | p<0.0001             |
| Body Mass Index (kilograms/meter <sup>2</sup> ) | 31 (6)       | 33 (7)                                | 30 (5)                                | 25 (4)                               | p<0.0001             |
| Blood Pressure Medication (%)                   | 27           | 42                                    | 22                                    | 0                                    | p<0.0001             |
| Diabetes Medication (%)                         | 10           | 24                                    | 4                                     | 0                                    | p<0.0001             |
| Cholesterol Medication (%)                      | 13           | 33                                    | 4                                     | 0                                    | p<0.0001             |
| Fasting Status (%)                              | 43           | 53                                    | 40                                    | 21                                   | p=0.0002             |

|                                              |    |    |    |     |          |
|----------------------------------------------|----|----|----|-----|----------|
| Ideal AHA Smoking (%) <sup>#</sup>           | 86 | 73 | 91 | 95  | p<0.0001 |
| Ideal AHA Physical Activity (%) <sup>#</sup> | 58 | 27 | 69 | 95  | p<0.0001 |
| Ideal AHA Blood Pressure (%) <sup>#</sup>    | 7  | 0  | 5  | 48  | p<0.0001 |
| Ideal AHA Glucose (%) <sup>#</sup>           | 65 | 24 | 81 | 98  | p<0.0001 |
| Ideal AHA Body mass index (%) <sup>#</sup>   | 14 | 2  | 12 | 74  | p<0.0001 |
| Ideal AHA Cholesterol (%) <sup>#</sup>       | 75 | 44 | 88 | 100 | p<0.0001 |

Analytic cohort limited to only those who had values for all 4 Socioeconomic status variables (education, employment status, health insurance, and income)

AHA = American Heart Association; CV = Cardiovascular

\* Mean (SD) or percentages are listed, p-values calculated using chi-square or Fisher's exact (categorical variables), and ANOVA (parametric continuous variables)

<sup>†</sup> Health Insurance: No Insurance n=51, Medicaid n=41, Medicare n=71, Private Insurance n=409, Combination n=16

<sup>‡</sup> Education: High School or Less n=117, Some College n=113, Completed College n=207, Professional Degree n=113, Other n=38

<sup>§</sup> Occupation: Employed n=460, Unemployed n=27, Student n=16, Retired n=85

<sup>||</sup> Income: ≥\$75,000 n=171, \$50,000 – 74,999 n=186, \$20,000 – 49,999 n=189, <\$20,000 n=42

<sup>#</sup> AHA Ideal Cardiovascular Health recommendations were defined by AHA "2020" guidelines with the following modifications. Physical activity was considered ideal if participant exercised ≥ 3 times per week. Glucose was defined using standard fasting glucose guidelines and random glucose guidelines < 140 ideal, 140-180 intermediate and ≥ 180 "poor"

**Table S8. The Association of Location with Ideal Cardiovascular Health.**

| Multinomial Logistic Regression | 5-6 vs. 0-2 ICH Components, Odds Ratio (95% CI), p-value | 3-4 vs. 0-2 ICH Components, Odds Ratio (95% CI), p-value |
|---------------------------------|----------------------------------------------------------|----------------------------------------------------------|
| Ohio                            | Referent                                                 | Referent                                                 |
| DMV                             | 1.00 (0.20, 5.09), p=0.998                               | 2.01 (0.83, 4.89), p=0.123                               |
| North Carolina                  | 1.61 (0.83, 3.13), p=0.160                               | 1.10 (0.73, 1.66), p=0.660                               |
| Washington                      | 0.53 (0.07, 4.32), p=0.554                               | 0.78 (0.33, 1.80), p=0.553                               |
| Other                           | 1.60 (0.15, 16.59), p=0.695                              | 0.37 (0.06, 2.25), p=0.277                               |

Total cohort is 1444

DMV – Washington DC, Maryland, and Virginia

ICH – Ideal Cardiovascular Health

**Table S9. The Association of Educational Attainment, Employment Status, Health Insurance Status, and Annual Income with Ideal Cardiovascular Health among Participants with Data for all Socioeconomic Status Characteristics (n=588)\*.**

| Multinomial Logistic Regression      | 5-6 vs. 0-2 ICH Components, Odds Ratio (95% CI), p-value | 3-4 vs. 0-2 ICH Components, Odds Ratio (95% CI), p-value |
|--------------------------------------|----------------------------------------------------------|----------------------------------------------------------|
| Educational Attainment <sup>†</sup>  |                                                          |                                                          |
| High School or Less                  | Referent                                                 | Referent                                                 |
| Some College                         | 1.99 (0.63, 6.34), p=0.242                               | 1.25 (0.72, 2.19), p=0.432                               |
| Completed College                    | 2.46 (0.87, 6.97), p=0.091                               | <b>1.78 (1.08, 2.93), p=0.025</b>                        |
| Professional Degree                  | 2.39 (0.75, 7.66), p=0.142                               | 1.61 (0.91, 2.85), p=0.105                               |
| Other                                | 0.46 (0.05, 4.26), p=0.495                               | 0.85 (0.40, 1.81), p=0.671                               |
| Employment Status <sup>‡</sup>       |                                                          |                                                          |
| Employed                             | Referent                                                 | Referent                                                 |
| Unemployed                           | 0.55 (0.11, 2.75), p=0.470                               | <b>0.38 (0.17, 0.86), p=0.020</b>                        |
| Student                              | 1.37 (0.31, 6.10), p=0.681                               | 0.38 (0.12, 1.20), p=0.098                               |
| Retired                              | <b>4.02 (1.05, 15.39), p=0.042</b>                       | 0.72 (0.40, 1.29), p=0.266                               |
| Health Insurance Status <sup>§</sup> |                                                          |                                                          |
| Private Insurance                    | Referent                                                 | Referent                                                 |
| Medicaid                             | 0.75 (0.19, 2.94), p=0.680                               | 0.65 (0.32, 1.31), p=0.228                               |
| Medicare                             | <b>3.04 (1.16, 7.99), p=0.024</b>                        | 0.57 (0.32, 1.03), p=0.062                               |
| No Insurance                         | 1.06 (0.37, 3.05), p=0.909                               | <b>0.50 (0.26, 0.95), p=0.033</b>                        |
| Combination                          | N/A                                                      | 0.60 (0.21, 1.77), p=0.358                               |
| Annual Income <sup>  </sup>          |                                                          |                                                          |
| ≥ \$75,000                           | Referent                                                 | Referent                                                 |
| \$50,000 – \$74,999                  | <b>0.26 (0.08, 0.90), p=0.033</b>                        | 1.07 (0.67, 1.72), p=0.771                               |
| \$20,000 – \$49,999                  | 1.18 (0.50, 2.78), p=0.713                               | 0.82 (0.51, 1.31), p=0.402                               |
| < \$20,000                           | 1.08 (0.32, 3.62), p=0.907                               | <b>0.37 (0.18, 0.78), p=0.009</b>                        |

Model: adjusted for age

## ICH – Ideal Cardiovascular Health

\* The outcome (ideal cardiovascular health score) included blood pressure, glucose, cholesterol, body mass index, smoking, physical activity

<sup>b</sup> Educational Attainment: High School or Less n=117, Some College n=113, Completed College n=207, Professional Degree n=113, Other n=38

Example Interpretation: Completing college compared to high school education or less was associated with 38% higher odds of attaining 5-6 ideal metrics compared to 3-4, which was non-significant with a p-value of 0.522

Completing college compared to high school education or less was associated with 146% higher odds of attaining 5-6 ideal metrics compared to 0-2, which was non-significant with a p-value of 0.091

Completing college compared to high school education or less was associated with 78% higher odds of attaining 3-4 ideal metrics compared to 0-2, which was significant with a p-value of 0.025

<sup>‡</sup> Employment Status: Employed n=460, Unemployed n=27, Student n=16, Retired n=85

Example Interpretation: Retired status compared to employed status was associated with 460% higher odds of attaining 5-6 ideal metrics compared to 3-4, which was significant with a p-value of 0.010

Retired status compared to employed status was associated with 302% higher odds of attaining 5-6 ideal metrics compared to 0-2, which was significant with a p-value of 0.042

Unemployed status compared to employed status was associated with 62% lower odds of attaining 3-4 ideal metrics compared to 0-2, which was significant with a p-value of 0.020

<sup>§</sup> Health Insurance Status: No Insurance n=51, Medicaid n=41, Medicare n=71, Private Insurance n=409, Combination n=16

Example Interpretation: Medicare compared to private insurance was associated with 204% higher odds of attaining 5-6 ideal metrics compared to 0-2, which was significant with a p-value of 0.024

<sup>||</sup> Annual Income: ≥\$75,000 n=171, \$50,000 – 74,999 n=186, \$20,000 – 49,999 n=189, <\$20,000 n=42

Example Interpretation: Annual income < \$50,000-\$74,999 compared to ≥\$75,000 was associated with 74% lower odds of attaining 5-6 ideal metrics compared to 0-2, which was significant with a p-value of 0.033

**Table S10. The Association of Educational Attainment, Employment Status, Health Insurance Status, and Annual Income with Ideal Cardiovascular Health excluding participants missing data for each specific Socioeconomic Status Characteristic in that Category Alone<sup>\*,†</sup>**

| Multinomial Logistic Regression       | 5-6 vs. 0-2 ICH Components, Odds Ratio (95% CI), p-value | 3-4 vs. 0-2 ICH Components, Odds Ratio (95% CI), p-value |
|---------------------------------------|----------------------------------------------------------|----------------------------------------------------------|
| Educational Attainment <sup>‡</sup>   |                                                          |                                                          |
| High School or Less                   | Referent                                                 | Referent                                                 |
| Some College                          | 0.90 (0.45, 1.79), p=0.753                               | 0.87 (0.61, 1.24), p=0.443                               |
| Completed College                     | 1.34 (0.74, 2.42), p=0.332                               | 1.27 (0.92, 1.75), p=0.153                               |
| Professional Degree                   | 1.33 (0.66, 2.71), p=0.428                               | 1.11 (0.75, 1.64), p=0.595                               |
| Other                                 | 0.23 (0.03, 1.79), p=0.159                               | 0.82 (0.45, 1.49), p=0.509                               |
| Employment Status <sup>§</sup>        |                                                          |                                                          |
| Employed                              | Referent                                                 | Referent                                                 |
| Unemployed                            | 1.15 (0.42, 3.06), p=0.786                               | 0.72 (0.41, 1.07), p=0.257                               |
| Student                               | 1.78 (0.71, 4.47), p=0.220                               | 0.54 (0.26, 1.13), p=0.101                               |
| Retired                               | 1.67 (0.71, 4.47), p=0.268                               | 0.71 (0.46, 1.08), p=0.110                               |
| Health Insurance Status <sup>  </sup> |                                                          |                                                          |
| Private Insurance                     | Referent                                                 | Referent                                                 |
| Medicaid                              | 1.69 (0.81, 3.53), p=0.164                               | 0.73 (0.45, 1.17), p=0.188                               |
| Medicare                              | 1.43 (0.75, 2.72), p=0.282                               | <b>0.60 (0.42, 0.86), p=0.005</b>                        |
| No Insurance                          | 1.25 (0.63, 2.45), p=0.526                               | <b>0.65 (0.43, 0.99), p=0.043</b>                        |
| Combination                           | N/A                                                      | 0.61 (0.29, 1.30), p=0.201                               |
| Annual Income <sup>#</sup>            |                                                          |                                                          |
| ≥\$75,000                             | Referent                                                 | Referent                                                 |
| \$50,000 – \$74,999                   | <b>0.39 (0.16, 0.99), p=0.046</b>                        | 1.08 (0.74, 1.57), p=0.695                               |
| \$20,000 – \$49,999                   | 1.25 (0.62, 2.49), p=0.534                               | 0.84 (0.57, 1.22), p=0.352                               |
| <\$20,000                             | 1.17 (0.41, 3.36), p=0.765                               | <b>0.45 (0.23, 0.86), p=0.016</b>                        |

Model: adjusted for age

## ICH – Ideal Cardiovascular Health

\* The outcome (ideal cardiovascular health score) included blood pressure, glucose, cholesterol, body mass index, smoking, physical activity

<sup>†</sup> Missing values for each specific socioeconomic status measure were taken out for the respective analysis

<sup>‡</sup> Education: Education analyses included 1,355 individuals after excluding 89 individuals missing data on education. High School or Less n=324, Some College n=272, Completed College n=482, Professional Degree n=220, Other n=57

Example Interpretation: Completing college compared to high school education or less was associated with 34% higher odds of attaining 5-6 ideal metrics compared to 0-2, which was non-significant with a p-value of 0.332

<sup>§</sup> Employment Status: Employment status analyses included 994 individuals after excluding 450 individuals missing data on employment status. Employed n=719, Unemployed n=63, Student n=44, Retired n=168

Example Interpretation: Student status compared to employed status was associated with 78% higher odds of attaining 5-6 ideal metrics compared to 0-2, which was non-significant with a p-value of 0.220

Student status compared to employed status was associated with 46% lower odds of attaining 3-4 ideal metrics compared to 0-2, which was non-significant with a p-value of 0.101

<sup>||</sup> Health Insurance Status: Insurance analyses included 1,319 individuals after excluding 125 individuals missing data on insurance. No Insurance n=134, Medicaid n=100, Medicare n=186, Private Insurance n=869, Combination n=30

Example Interpretation: Medicare compared to private insurance was associated with 43% higher odds of attaining 5-6 ideal metrics compared to 0-2, which was non-significant with a p-value of 0.282

Medicare compared to private insurance was associated with 40% lower odds of attaining 3-4 ideal metrics compared to 0-2, which was significant with a p-value of 0.005

<sup>#</sup> Annual Income: Annual income analyses included 912 individuals after excluding 532 individuals missing data on annual income. Annual income  $\geq$ \$75,000 n=274, \$50,000 – 74,999 n=294, \$20,000 – 49,999 n=292,  $<$ \$20,000 n=52

Example Interpretation: Annual income \$50,000-\$74,999 compared to  $\geq$ \$75,000 was associated with 61% lower odds of attaining 5-6 ideal metrics compared to 0-2, which was significant with a p-value of 0.046

Annual income  $<$ \$20,000 compared to  $\geq$ \$75,000 was associated with 55% lower odds of attaining 3-4 ideal metrics compared to 0-2, which was significant with a p-value of 0.016



**Table S11. The Association of Educational Attainment, Employment Status, Health Insurance Status, and Annual Income with Ideal Cardiovascular Health with all Socioeconomic Status Measures in the Model (n=1444)\***

| Multinomial Logistic Regression      | 5-6 vs. 0-2 ICH Components, Odds Ratio (95% CI), p-value | 3-4 vs. 0-2 ICH Components, Odds Ratio (95% CI), p-value |
|--------------------------------------|----------------------------------------------------------|----------------------------------------------------------|
| Educational Attainment <sup>†</sup>  |                                                          |                                                          |
| High School or Less                  | Referent                                                 | Referent                                                 |
| Some College                         | 0.97 (0.48, 1.98), p=0.943                               | 0.80 (0.55, 1.15), p=0.223                               |
| Completed College                    | 1.78 (0.94, 3.34), p=0.075                               | 1.11 (0.79, 1.56), p=0.550                               |
| Professional Degree                  | 2.15 (0.98, 4.74), p=0.057                               | 0.93 (0.61, 1.42), p=0.741                               |
| Other                                | 0.27 (0.03, 2.18), p=0.219                               | 0.77 (0.41, 1.42), p=0.402                               |
| Did Not Answer                       | 1.56 (0.57, 4.30), p=0.387                               | 0.97 (0.56, 1.67), p=0.901                               |
| Employment Status <sup>‡</sup>       |                                                          |                                                          |
| Employed                             | Referent                                                 | Referent                                                 |
| Unemployed                           | 1.07 (0.38, 3.01), p=0.905                               | 0.86 (0.47, 1.55), p=0.608                               |
| Student                              | 2.06 (0.79, 5.37), p=0.138                               | 0.62 (0.30, 1.30), p=0.207                               |
| Retired                              | 1.49 (0.59, 3.73), p=0.396                               | 0.90 (0.58, 1.39), p=0.637                               |
| Did Not Answer                       | 0.86 (0.50, 1.49), p=0.587                               | 1.12 (0.84, 1.49), p=0.453                               |
| Health Insurance Status <sup>§</sup> |                                                          |                                                          |
| Private Insurance                    | Referent                                                 | Referent                                                 |
| Medicaid                             | 1.73 (0.80, 3.76), p=0.165                               | 0.79 (0.49, 1.30), p=0.359                               |
| Medicare                             | 1.33 (0.66, 2.68), p=0.429                               | <b>0.67 (0.45, 0.98), p=0.039</b>                        |
| No Insurance                         | 1.23 (0.59, 2.54), p=0.582                               | 0.72 (0.47, 1.11), p=0.137                               |
| Combination                          | N/A                                                      | 0.70 (0.32, 1.54), p=0.371                               |
| Did Not Answer                       | 1.07 (0.49, 2.36), p=0.866                               | 0.86 (0.56, 1.33), p=0.495                               |
| Annual Income <sup>  </sup>          |                                                          |                                                          |
| ≥\$75,000                            | Referent                                                 | Referent                                                 |
| \$50,000 – \$74,999                  | 0.50 (0.20, 1.25), p=0.139                               | 1.11 (0.76, 1.64), p=0.593                               |
| \$20,000 – \$49,999                  | 1.63 (0.78, 3.40), p=0.190                               | 0.91 (0.61, 1.35), p=0.628                               |

|                |                            |                            |
|----------------|----------------------------|----------------------------|
| <\$20,000      | 1.54 (0.50, 4.77), p=0.455 | 0.61 (0.30, 1.24), p=0.170 |
| Did Not Answer | 1.20 (0.60, 2.38), p=0.609 | 0.95 (0.67, 1.36), p=0.794 |

Model: age + education + employment + insurance + income (SES measures together with age in the model)

The table includes the “Did Not Answer” responses.

ICH = ideal cardiovascular health

\* The outcome (ideal cardiovascular health score) included blood pressure, glucose, cholesterol, body mass index, smoking, physical activity

† Education: High School or Less n=324, Some College n=272, Completed College n=482, Professional Degree n=220, Other n=57, Did Not Answer n=89

Example Interpretation: Completing college compared to high school education or less was associated with 78% higher odds of attaining 5-6 ideal metrics compared 0-2, which was non-significant with a p-value of 0.075

‡ Employment Status: Employed n=719, Unemployed n=63, Student n=44, Retired n=168, Missing/Did Not Answer n=450

Example Interpretation: Student status compared to employed status was associated with 38% lower odds of attaining 3-4 ideal metrics compared to 0-2, which was non-significant with a p-value of 0.207

§ Health Insurance Status: No Insurance n=134, Medicaid n=100, Medicare n=186, Private Insurance n=869, Combination n=30, Did Not Answer n=125

Example Interpretation: Medicare compared to private insurance was associated with 33% higher odds of attaining 5-6 ideal metrics compared to 0-2, which was non-significant with a p-value of 0.429

Medicare compared to private insurance was associated with 33% lower odds of attaining 3-4 ideal metrics compared to 0-2, which was significant with a p-value of 0.039

|| Annual Income: ≥\$75,000 n=274, \$50,000 – 74,999 n=294, \$20,000 – 49,999 n=292, <\$20,000 n=52, Did Not Answer n=532

Example Interpretation: Annual income \$20,000-\$49,999 compared to ≥\$75,000 was associated with 63% higher odds of attaining 5-6 ideal metrics compared to 0-2, which was non-significant with a p-value of 0.190

**Table S12. Type III Analysis of The Effect of Educational Attainment, Employment Status, Health Insurance Status, and Annual Income on Ideal Cardiovascular Health.**

| Type III Analysis of Effect |                    |                 |         |
|-----------------------------|--------------------|-----------------|---------|
| Effect                      | Degrees of Freedom | Wald Chi-square | p-value |
| Educational Attainment      | 5                  | 6.9322          | 0.2257  |
| Employment Status           | 4                  | 1.5577          | 0.8164  |
| Health Insurance Status     | 5                  | 1.7180          | 0.8866  |
| Annual Income               | 4                  | 0.6989          | 0.9515  |

Model: age + education + employment + insurance + income (socioeconomic status measures together with age in the model)

A p-value > 0.05 indicate that the corresponding socioeconomic status measure has no effect on Ideal Cardiovascular Health given the other socioeconomic status measures in the model. In other words, the socioeconomic status measure does not significantly improve the model fit.

**Table S13. The Association of Educational Attainment, Employment Status, Health Insurance Status, and Annual Income with Ideal Cardiovascular Health among Participants with Data for all Socioeconomic Status Characteristics in the Model (n=588)\*.**

| Multinomial Logistic Regression      |                                                          |                                                          |
|--------------------------------------|----------------------------------------------------------|----------------------------------------------------------|
|                                      | 5-6 vs. 0-2 ICH Components, Odds Ratio (95% CI), p-value | 3-4 vs. 0-2 ICH Components, Odds Ratio (95% CI), p-value |
| Educational Attainment <sup>†</sup>  |                                                          |                                                          |
| High School or Less                  | Referent                                                 | Referent                                                 |
| Some College                         | 2.73 (0.78, 9.54), p=0.117                               | 1.08 (0.60, 1.95), p=0.788                               |
| Completed College                    | <b>3.97 (1.23, 12.76), p=0.021</b>                       | 1.53 (0.89, 2.63), p=0.127                               |
| Professional Degree                  | <b>5.08 (1.23, 21.03), p=0.025</b>                       | 1.26 (0.66, 2.42), p=0.489                               |
| Other                                | 0.80 (0.08, 7.89), p=0.845                               | 0.67 (0.31, 1.47), p=0.318                               |
| Employment Status <sup>‡</sup>       |                                                          |                                                          |
|                                      | 5-6 vs. 0-2 ICH Components                               | 3-4 vs. 0-2 ICH Components                               |
| Employed                             | Referent                                                 | Referent                                                 |
| Unemployed                           | 0.61 (0.11, 3.39), p=0.575                               | 0.44 (0.19, 1.06), p=0.066                               |
| Student                              | 1.73 (0.31, 9.62), p=0.529                               | 0.50 (0.15, 1.66), p=0.256                               |
| Retired                              | 3.00 (0.61, 14.82), p=0.178                              | 0.95 (0.48, 1.86), p=0.872                               |
| Health Insurance Status <sup>§</sup> |                                                          |                                                          |
|                                      | 5-6 vs. 0-2 ICH Components                               | 3-4 vs. 0-2 ICH Components                               |
| Private Insurance                    | Referent                                                 | Referent                                                 |
| Medicaid                             | 0.63 (0.15, 2.64), p=0.526                               | 0.76 (0.36, 1.59), p=0.460                               |
| Medicare                             | 2.17 (0.66, 7.11), p=0.203                               | 0.65 (0.33, 1.27), p=0.210                               |
| No Insurance                         | 0.99 (0.30, 3.25), p=0.987                               | 0.64 (0.32, 1.27), p=0.206                               |
| Combination                          | N/A                                                      | 0.67 (0.21, 2.10), p=0.488                               |
| Annual Income <sup>  </sup>          |                                                          |                                                          |
|                                      | 5-6 vs. 0-2 ICH Components                               | 3-4 vs. 0-2 ICH Components                               |
| ≥ \$75,000                           | Referent                                                 | Referent                                                 |
| \$50,000 – \$74,999                  | 0.32 (0.09, 1.15), p=0.081                               | 1.16 (0.70, 1.91), p=0.572                               |
| \$20,000 – \$49,999                  | 1.66 (0.59, 4.74), p=0.340                               | 1.01 (0.59, 1.73), p=0.978                               |

|            |                            |                            |
|------------|----------------------------|----------------------------|
| < \$20,000 | 1.53 (0.32, 7.31), p=0.596 | 0.69 (0.29, 1.64), p=0.394 |
|------------|----------------------------|----------------------------|

Model: age + education + employment + insurance + income (socioeconomic status measures together with age in the model)

#### ICH – Ideal Cardiovascular Health

\* The outcome (ideal cardiovascular health score) included blood pressure, glucose, cholesterol, body mass index, smoking, physical activity

† Educational Attainment: High School or Less n=117, Some College n=113, Completed College n=207, Professional Degree n=113, Other n=38

Example Interpretation: Completing college compared to high school education or less was associated with 297% higher odds of attaining 5-6 ideal metrics compared to 0-2, which was significant with a p-value of 0.021

‡ Employment Status: Employed n=460, Unemployed n=27, Student n=16, Retired n=85

Example Interpretation: Retired status compared to employed status was associated with 5% lower odds of attaining 3-4 ideal metrics compared to 0-2, which was non-significant with a p-value of 0.872

§ Health Insurance Status: No Insurance n=51, Medicaid n=41, Medicare n=71, Private Insurance n=409, Combination n=16

Example Interpretation: Medicare compared to private insurance was associated with 117% higher odds of attaining 5-6 ideal metrics compared to 0-2, which was non-significant with a p-value of 0.203

|| Annual Income: ≥\$75,000 n=171, \$50,000 – 74,999 n=186, \$20,000 – 49,999 n=189, <\$20,000 n=42

Example Interpretation: Annual income \$50,000-\$74,999 compared to ≥\$75,000 was associated with 16% higher odds of attaining 3-4 ideal metrics compared to 0-2, which was non-significant with a p-value of 0.572
